# Supplementary material
Source: publisher site journal article supplement (https://www.kjim.org/upload/media/kjim-2022-084_suppl7.pdf)
Supplement: Supplementary file 1 [file kjim-2022-084_suppl7.pdf]

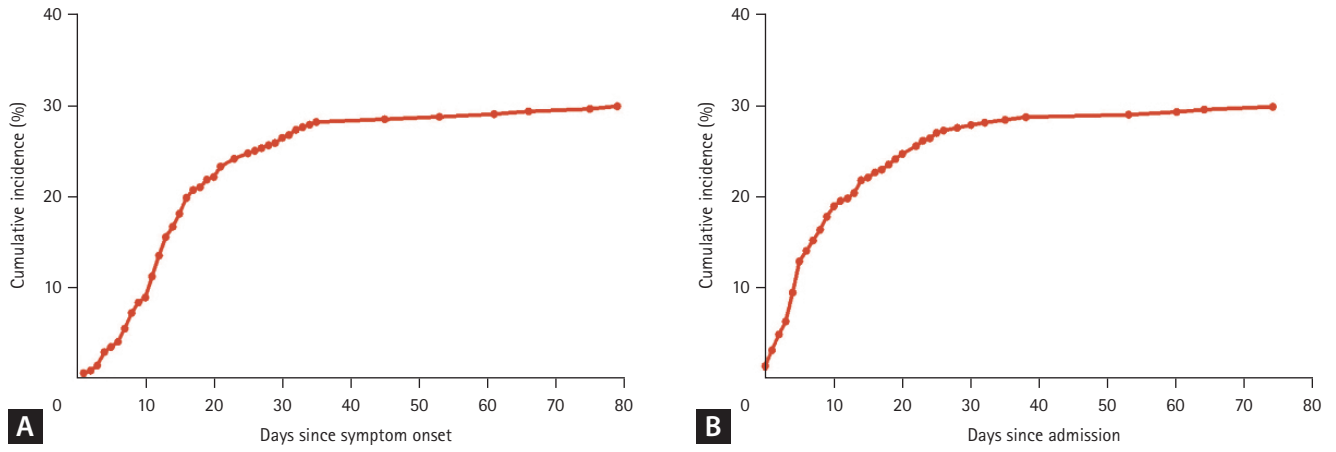

**Supplementary Figure 1.** Line graph showing cumulative incidence of infection. (A) Days since symptom onset. (B) Days since admission.
